# Supplementary material for: Oncogenic potential of histone-variant H2A.Z.1 and its regulatory role in cell cycle and epithelial-mesenchymal transition in liver cancer
Source: PubMed Central journal article supplement (PMC4905482; doi:10.18632/oncotarget.7194), 2016-02-04
Supplement: oncotarget-07-11412-s001.pdf [file oncotarget-07-11412-s001.pdf]

# Oncogenic potential of histone-variant H2A.Z.1 and its regulatory role in cell cycle and epithelial-mesenchymal transition in liver cancer

## Supplementary Materials

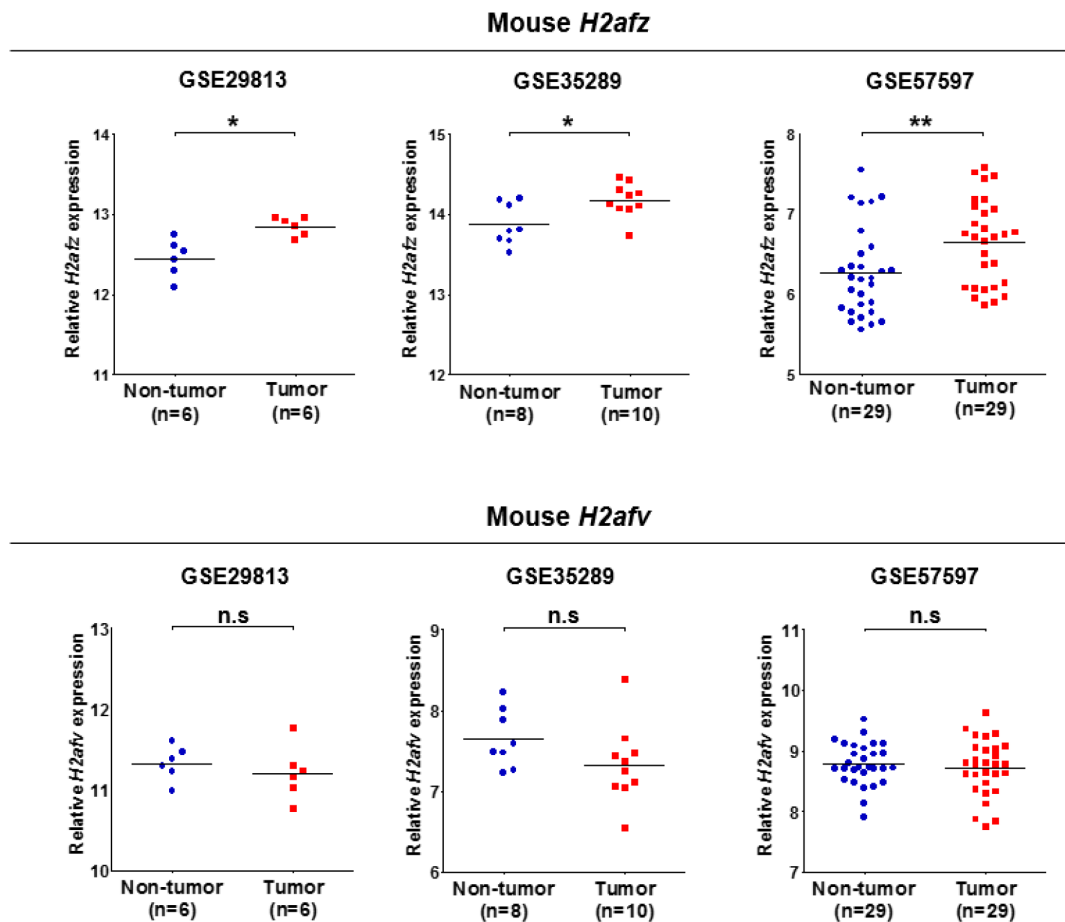

**Supplementary Figure S1: Aberrant expression of *H2afz* in a subset of mouse HCC.** Analysis of microarray data from the Gene Expression Omnibus (GEO) database. GSE data sets of GSE29813, GSE35289, and GSE57597 showed that *H2afz* was significantly overexpressed in mouse HCC. Upper panel: *H2afz* mRNA expression in mouse HCC. Lower panel: *H2afv* mRNA expression in mouse HCC (mean  $\pm$  S.D., \*\* $P < 0.01$ , \* $P < 0.05$ , versus Non-tumor).

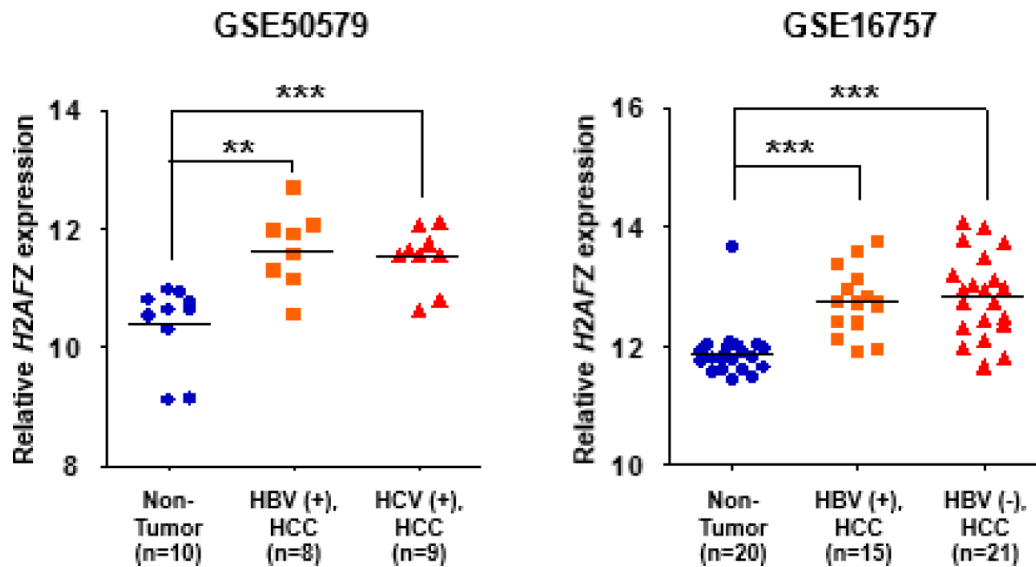

**Supplementary Figure S2: The *H2AFZ* gene expression in HCC patients with different etiologies.** GSE50579 and GSE16757 showed that *H2AFZ* was significantly overexpressed regardless HBV or HCV etiology. Comparison of *H2AFZ* expression in HCC patients with HBV(+) and HCV(+) versus non-tumor (GSE50579) or HBV(+) and HBV(-) versus non-tumor (GSE16757) (mean  $\pm$  S.D., \*\*\* $P < 0.001$ , \*\* $P < 0.01$ , versus Non-tumor).

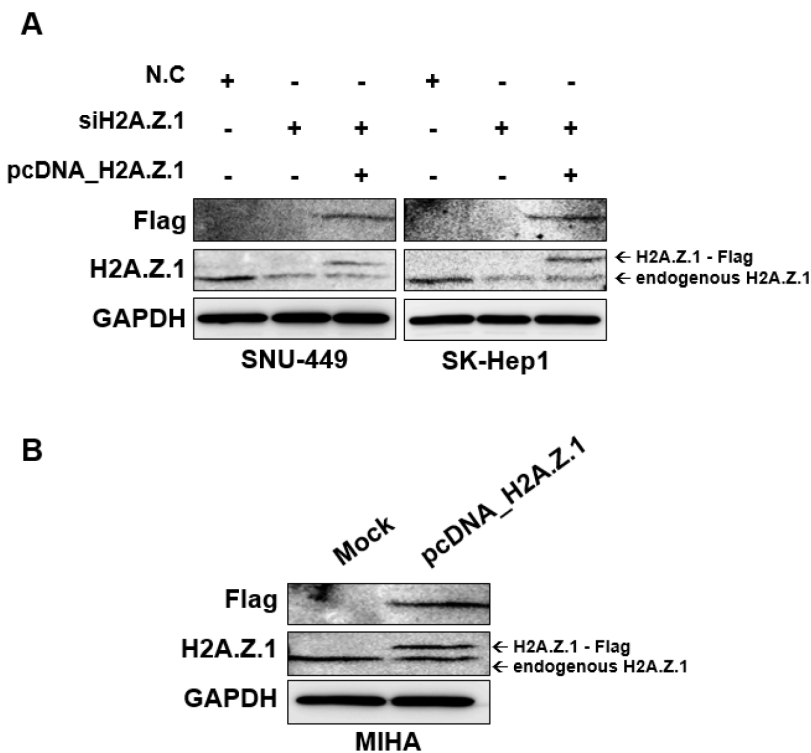

**Supplementary Figure S3: Western blot analysis of H2A.Z.1 expressing plasmid in liver cell lines.** (A) After 48 hr transfection, cell lysate was obtained and western blot analysis was performed to specific antibodies. (B) Each pcDNA3.1\_Mock or pcDNA3.1\_H2A.Z.1 plasmid was transfected into MIHA cells. After 48 hr incubation, the western blot analysis was performed for detection of endogenous or exogenous H2A.Z.1 protein.

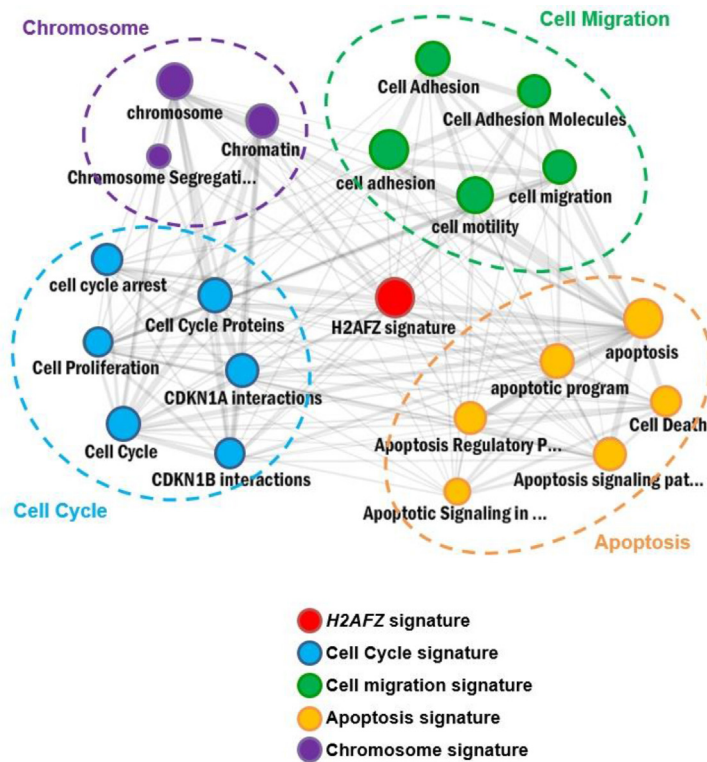

**Supplementary Figure S4: An enrichment network analysis that linked *H2AFZ* signatures with cellular pathways.** *H2AFZ*-associated genes were analyzed by using the molecular concept map (ConceptGen). Four major molecular concepts were indicated by colored circles.

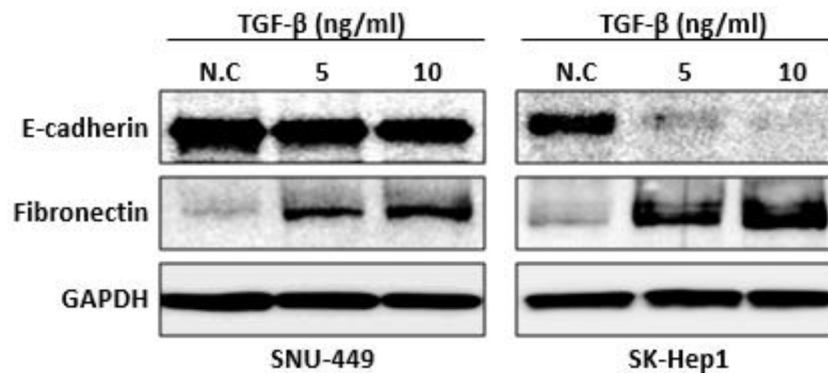

**Supplementary Figure S5: Effect of TGF- $\beta$  on E-cadherin and fibronectin expression in liver cancer cells.** The western blot analysis was performed and the protein levels of E-cadherin and fibronectin were detected by specific antibodies. The GAPDH was used for a loading control.

**Supplementary Table S1: *H2AFZ* and *H2AFV* expression in HCC GEO datasets**

| GEO No.      | GSE14520           |             | GSE16757          |             | GSE22058          |             | GSE36376           |             |
|--------------|--------------------|-------------|-------------------|-------------|-------------------|-------------|--------------------|-------------|
| cohort       | (N = 220, T = 225) |             | (N = 20, T = 100) |             | (N = 97, T = 100) |             | (N = 193, T = 240) |             |
|              | Fold change        | P value     | Fold change       | P value     | Fold change       | P value     | Fold change        | P value     |
| <i>H2AFZ</i> | 2.771              | $p < 0.001$ | 2.126             | $p < 0.001$ | 1.535             | $p < 0.001$ | 2.279              | $p < 0.001$ |
| <i>H2AFV</i> | 1.154              | $p < 0.001$ | 1.015             | ns          | 1.112             | $p < 0.01$  | 1.098              | $p < 0.001$ |

**Supplementary Table S2: *H2AFZ*-associated functional annotation cluster list**

| Cluster No. | Title         | Term                            | Count | p value     |
|-------------|---------------|---------------------------------|-------|-------------|
| 1           | Cell Cycle    | cell cycle phase                | 45    | $p < 0.001$ |
|             |               | cell cycle                      | 58    | $p < 0.001$ |
|             |               | M phase                         | 36    | $p < 0.001$ |
|             |               | cell cycle process              | 47    | $p < 0.001$ |
|             |               | mitotic cell cycle              | 36    | $p < 0.001$ |
|             |               | organelle fission               | 25    | $p < 0.001$ |
|             |               | mitosis                         | 24    | $p < 0.001$ |
|             |               | nuclear division                | 24    | $p < 0.001$ |
|             |               | M phase of mitotic cell cycle   | 24    | $p < 0.001$ |
|             |               | cell division                   | 23    | $p < 0.001$ |
| 2           | DNA Repair    | DNA metabolic process           | 45    | $p < 0.001$ |
|             |               | DNA repair                      | 26    | $p < 0.001$ |
|             |               | response to DNA damage stimulus | 30    | $p < 0.001$ |
|             |               | cellular response to stress     | 33    | $p < 0.001$ |
| 3           | Nuclear Lumen | organelle lumen                 | 82    | $p < 0.001$ |
|             |               | nucleoplasm                     | 51    | $p < 0.001$ |
|             |               | intracellular organelle lumen   | 80    | $p < 0.001$ |
|             |               | membrane-enclosed lumen         | 82    | $p < 0.001$ |
|             |               | nuclear lumen                   | 66    | $p < 0.001$ |

|   |                               |                                                      |    |             |
|---|-------------------------------|------------------------------------------------------|----|-------------|
| 4 | <b>Chromosome</b>             | chromosome                                           | 44 | $p < 0.001$ |
|   |                               | chromosomal part                                     | 37 | $p < 0.001$ |
|   |                               | condensed chromosome                                 | 20 | $p < 0.001$ |
|   |                               | chromosome, centromeric region                       | 18 | $p < 0.001$ |
|   |                               | kinetochore                                          | 13 | $p < 0.001$ |
|   |                               | condensed chromosome, centromeric region             | 12 | $p < 0.001$ |
|   |                               | condensed chromosome kinetochore                     | 11 | $p < 0.001$ |
|   |                               | chromosome segregation                               | 11 | $p < 0.001$ |
|   |                               | non-membrane-bounded organelle                       | 88 | $p < 0.001$ |
|   |                               | intracellular non-membrane-bounded organelle         | 88 | $p < 0.001$ |
| 5 | <b>Mitosis</b>                | mitotic cell cycle                                   | 36 | $p < 0.001$ |
|   |                               | interphase of mitotic cell cycle                     | 15 | $p < 0.001$ |
|   |                               | interphase                                           | 15 | $p < 0.001$ |
|   |                               | G1/S transition of mitotic cell cycle                | 8  | $p < 0.001$ |
| 6 | <b>Macromolecule Assembly</b> | macromolecular complex subunit organization          | 39 | $p < 0.001$ |
|   |                               | macromolecular complex assembly                      | 35 | $p < 0.001$ |
|   |                               | cellular macromolecular complex subunit organization | 23 | $p < 0.001$ |
|   |                               | cellular macromolecular complex assembly             | 19 | $p < 0.001$ |
|   |                               | protein complex biogenesis                           | 25 | $p < 0.01$  |
|   |                               | protein complex assembly                             | 25 | $p < 0.01$  |
| 7 | <b>Meiosis</b>                | DNA recombination                                    | 13 | $p < 0.001$ |
|   |                               | meiotic cell cycle                                   | 12 | $p < 0.001$ |
|   |                               | M phase of meiotic cell cycle                        | 11 | $p < 0.001$ |
|   |                               | meiosis                                              | 11 | $p < 0.001$ |
|   |                               | reciprocal meiotic recombination                     | 4  | $p < 0.05$  |
|   |                               | meiosis I                                            | 4  | n.s         |
| 8 | <b>Microtubule Process</b>    | microtubule cytoskeleton organization                | 14 | $p < 0.001$ |
|   |                               | spindle organization                                 | 8  | $p < 0.001$ |
|   |                               | microtubule-based process                            | 17 | $p < 0.001$ |
|   |                               | cytoskeleton organization                            | 19 | $p < 0.05$  |

|    |                 |                                             |    |             |
|----|-----------------|---------------------------------------------|----|-------------|
| 9  | ATPase Activity | DNA-dependent ATPase activity               | 9  | $p < 0.001$ |
|    |                 | ATPase activity                             | 20 | $p < 0.001$ |
|    |                 | ATPase activity, coupled                    | 15 | $p < 0.01$  |
| 10 | DNA Replication | replication fork                            | 8  | $p < 0.001$ |
|    |                 | DNA replication factor C complex            | 4  | $p < 0.001$ |
|    |                 | nucleotide-excision repair, DNA gap filling | 5  | $p < 0.001$ |
|    |                 | DNA clamp loader activity                   | 3  | $p < 0.001$ |
|    |                 | protein-DNA loading ATPase activity         | 3  | $p < 0.01$  |
|    |                 | nucleotide-excision repair                  | 6  | $p < 0.01$  |

**Supplementary Table S3: Positive enrichment gene sets of *H2AFZ* high**

| No. | Gene Sets                                      | SIZE | ES   | NES  |
|-----|------------------------------------------------|------|------|------|
| 1   | REACTOME_CELL_CYCLE                            | 42   | 0.65 | 1.35 |
| 2   | REACTOME_CELL_CYCLE_MITOTIC                    | 38   | 0.64 | 1.32 |
| 3   | REACTOME_MITOTIC_M_M_G1_PHASES                 | 23   | 0.66 | 1.28 |
| 4   | REACTOME_MITOTIC_PROMETAPHASE                  | 16   | 0.62 | 1.24 |
| 5   | REACTOME_DNA_REPLICATION                       | 28   | 0.6  | 1.2  |
| 6   | REACTOME_ADAPTIVE_IMMUNE_SYSTEM                | 17   | 0.4  | 1.16 |
| 7   | REACTOME_IMMUNE_SYSTEM                         | 25   | 0.24 | 0.76 |
| 8   | REACTOME_HEMOSTASIS                            | 22   | 0.18 | 0.55 |
| 9   | REACTOME_METABOLISM_OF_LIPIDS_AND_LIPOPROTEINS | 16   | 0.19 | 0.53 |
